# Supplementary material for: A unified mixed-model method for association mapping that accounts for multiple levels of relatedness
Source: Springer Nature journal article supplement (doi:10.1038/ng1702), 2005-12-25
Supplement: 41588_2006_BFng1702_MOESM1_ESM.pdf [file 41588_2006_BFng1702_MOESM1_ESM.pdf]

# Supplementary Figure 1

*RPS26*

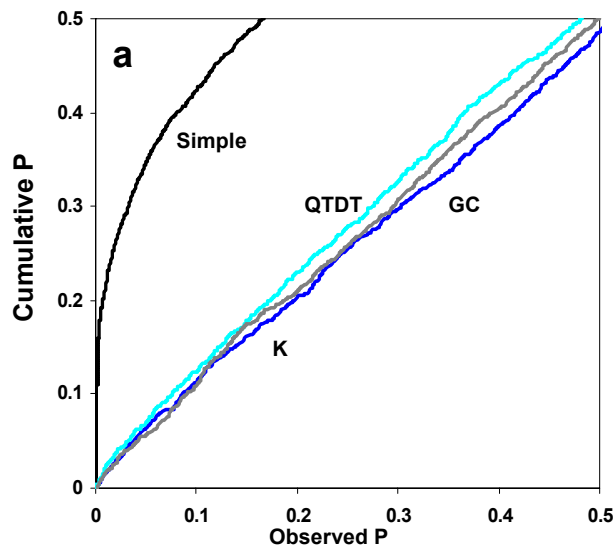

*UBE2L3*

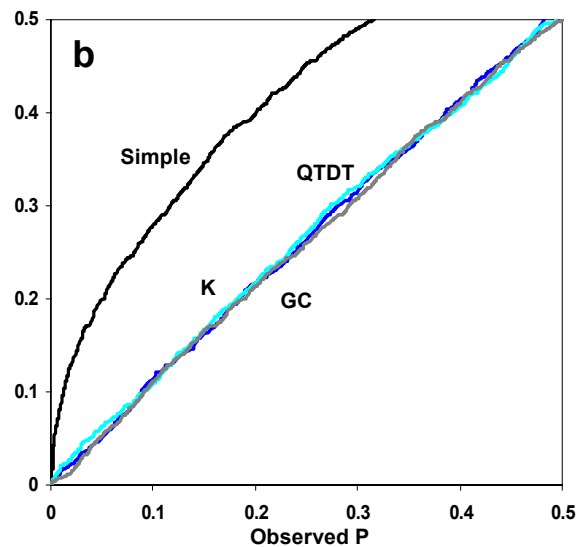

*SSR1*

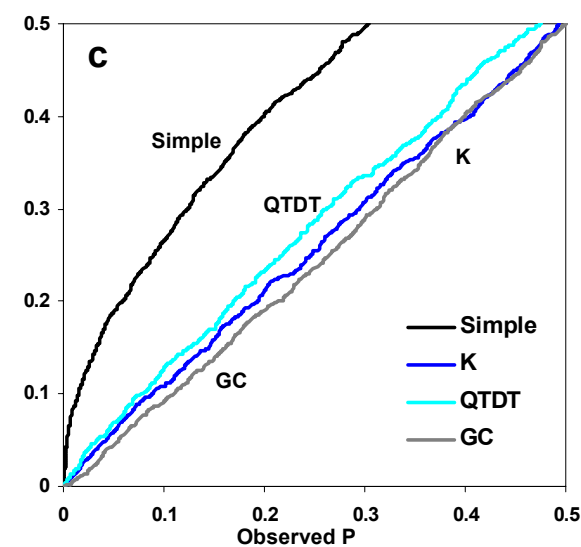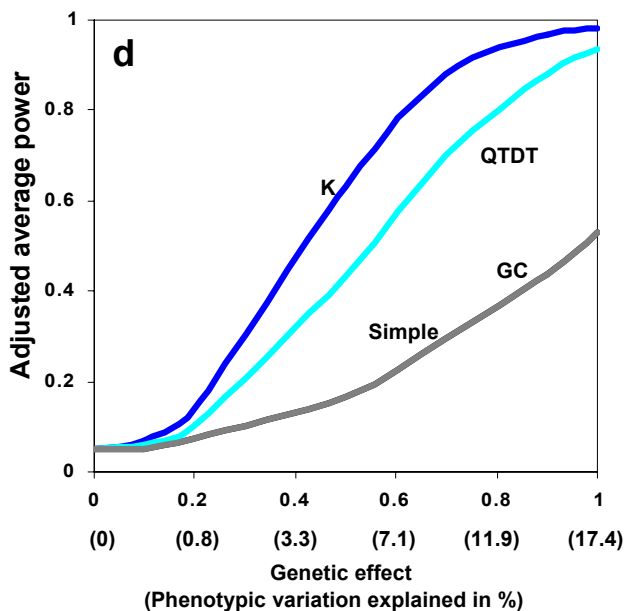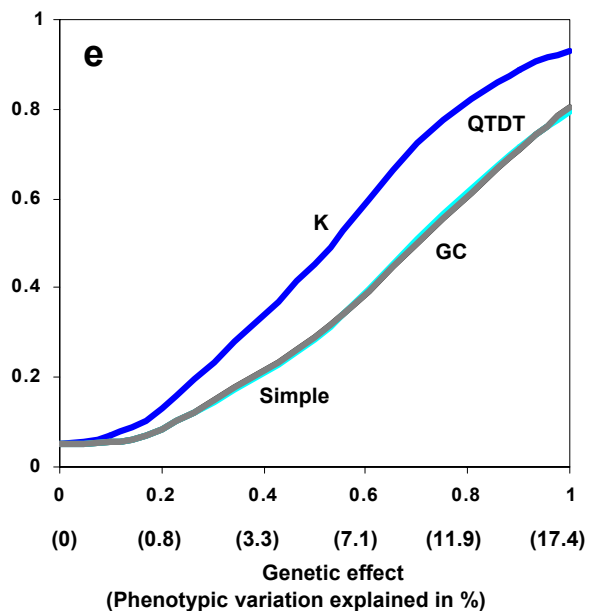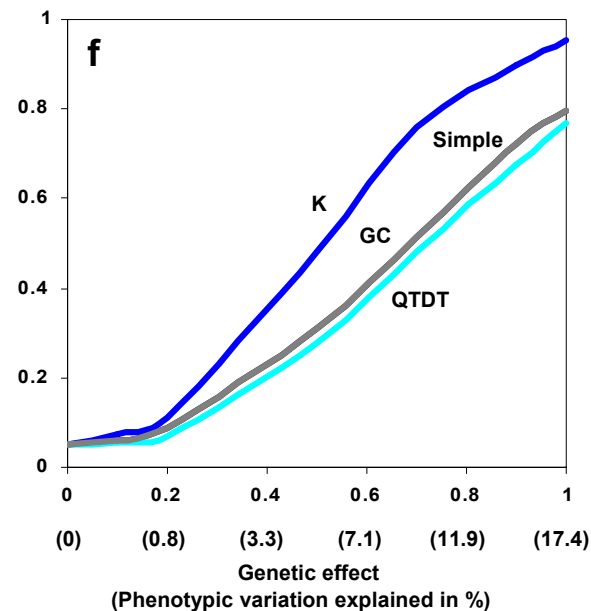

**Supplementary Figure 1 Model comparison with three additional human gene expression phenotypes. 1a-c** Evaluation of the model Type I error rates using random SNPs for gene expression phenotypes, *RPS26* (**1a**), *UBE2L3* (**1b**), and *SSRI* (**1c**). The cumulative distributions of observed  $P$  values are presented for the simple model, the K model, QTDT, and the simple model with genomic control (GC). Under the expectation that random SNPs are unlinked to the polymorphisms controlling these traits ( $H_0$ : no SNP effect), approaches that appropriately control for Type I errors should exhibit a uniform distribution of  $P$  values (a diagonal line in these cumulative plots). The simple model was included only for the purpose of illustrating the effect of ignoring family relationships, as it is not a standard practice. **1d-f** The adjusted average power of the models for *RPS26* (**1d**), *UBE2L3* (**1e**), and *SSRI* (**1f**). A genetic effect was added to each random SNP (QTN effect), where  $k = 0.1, 0.2, 0.5, 0.7, 0.9$  and  $1.0$  times of the standard deviation of the phenotypic mean of a trait. Each model was adjusted based on its empirical Type I error rate. The adjusted average power for GC is the same as that of the simple model with the empirical threshold  $P$  value. For convenience of comparison we listed the point value of phenotypic variation explained by a QTN at the allele frequency of  $p = 0.3$ .
